# Supplementary material for: An evaluation and refinement of the “Hep B Story” app, tailored to meet the community’s cultural needs
Source: PubMed Central journal article supplement (PMC11162029; doi:10.1186/s12913-024-11149-y), 2024-06-07
Supplement: 12913_2024_11149_MOESM1_ESM.pdf [file 12913_2024_11149_MOESM1_ESM.pdf]

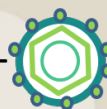

## Hep B PAST Partnership Members and Individuals

### Partner Organisations

|                                                    |
|----------------------------------------------------|
| Menzies School of Health Research                  |
| Northern Territory Government, NT Health           |
| ASHM                                               |
| Katherine West Health Board Aboriginal Corporation |
| Miwatj Health Aboriginal Corporation               |
| NT AIDS and Hepatitis Council, NTAHC               |
| Mala'la Health Service Aboriginal Corporation      |
| Marthakal Homelands Health Service                 |
| Central Australian Aboriginal Congress             |

### Associate Partner Organisations

|                                                                        |
|------------------------------------------------------------------------|
| WHO Collaborating Centre for Viral Hepatitis, VIDRL, Doherty Institute |
| Victorian Infectious Diseases Reference Laboratory - VIDRL             |
| Hepatitis Australia                                                    |

### Investigators and Contributors

|                              |                                                                        |    |
|------------------------------|------------------------------------------------------------------------|----|
| Jane Davies                  | Menzies School of Health Research and NT Health                        | CI |
| Sarah Mariyalawuy Bukulatjpi | Miwatj Health Aboriginal Corporation                                   | CI |
| Christine Connors            | NT Health                                                              | CI |
| Joshua Davis                 | Menzies School of Health Research                                      | CI |
| Robert Batey                 | NT Health                                                              | CI |
| Benjamin Cowie               | WHO Collaborating Centre for Viral Hepatitis, VIDRL, Doherty Institute | CI |
| Steven Tong                  | Doherty Institute for Infection and Immunity                           | CI |
| Anna Ralph                   | Menzies School of Health Research                                      | CI |
| Adrian Miller                | Central Queensland University                                          | CI |
| Kelly Hosking                | NT Health and Menzies School of Health Research                        | AI |
| George Garambaka Gurruwiwi   | Menzies School of Health Research                                      | AI |
| Roslyn Dhurrkay              | Miwatj Health Aboriginal Corporation                                   | AI |
| Belinda Greenwood-Smith      | NT Health                                                              | AI |
| Catherine Marshall           | NT Health                                                              | AI |
| Geoffrey Stewart             | NT Health                                                              | AI |
| Nicole Allard                | WHO Collaborating Centre for Viral Hepatitis, VIDRL, Doherty Institute | AI |
| Manoji Gunthilake            | NT Health                                                              | AI |
| Vicki Krause                 | NT Health                                                              | AI |
| Ashleigh Qama                | WHO Collaborating Centre for Viral Hepatitis, VIDRL, Doherty Institute | PI |
| Karen Fuller                 | Katherine West Health Board Aboriginal Corporation                     | PI |
| Jessica Michaels             | ASHM                                                                   | PI |

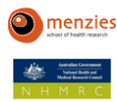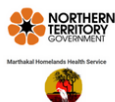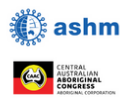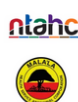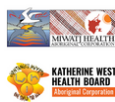

# Hep B PAST

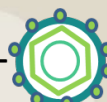

Partnership Approach to Sustainably eliminating chronic hepatitis B in the Northern Territory

|                          |                                                                        |    |
|--------------------------|------------------------------------------------------------------------|----|
| Lou Sanderson            | Miwatj Health Aboriginal Corporation                                   | PI |
| Phillip Merrdi Wilson    | NT Health                                                              | PI |
| Genevieve Dally          | NTAHC                                                                  | PI |
| Kerrie Jordan            | NTAHC                                                                  | PI |
| John Boffa               | Central Australian Aboriginal Congress                                 | PI |
| Alexis Apostolellis      | ASHM                                                                   | P  |
| Amanda Dhagapan          | Miwatj Health Aboriginal Corporation                                   | P  |
| Anna Deng                | WHO Collaborating Centre for Viral Hepatitis, VIDRL, Doherty Institute | P  |
| Anngie Everitt           | Menzies School of Health Research                                      | P  |
| Barbara De Graaff        | Menzies Institute for Medical Research                                 | P  |
| Brianna Summers          | Katherine West Health Board Aboriginal Corporation                     | P  |
| Carrie Fowler            | Hepatitis Australia                                                    | P  |
| Catherine Blacker        | NT Health and Menzies School of Health Research                        | P  |
| Catherine Gargan         | NT Health                                                              | P  |
| Catherine Stoddart       | NT Health                                                              | P  |
| Charles Pain             | NT Health                                                              | P  |
| Cheryl Ross              | Menzies School of Health Research                                      | P  |
| David McGuinness         | Katherine West Health Board Aboriginal Corporation                     | P  |
| David Reeve              | NT Health                                                              | P  |
| Diane Hampton            | Katherine West Health Board Aboriginal Corporation                     | P  |
| Eddie Mulholland         | Miwatj Health Aboriginal Corporation                                   | P  |
| Ella Meumann             | NT Health                                                              | P  |
| Elizabeth Coombes        | NT Health                                                              |    |
| Emily Vintour-Cesar      | Menzies School of Health Research                                      | P  |
| Emma Childs              | NT Health and Miwatj Health Aboriginal Corporation                     | P  |
| Hayden Jose              | ASHM                                                                   | P  |
| Hilary Bloomfield        | Miwatj Health Aboriginal Corporation                                   | P  |
| Hugh Heggie              | NT Health                                                              | P  |
| Isabelle Purcell         | ASHM                                                                   | P  |
| Jaclyn Tate-Baker        | NT Health                                                              | P  |
| Jayne Porter             | NT Health                                                              | P  |
| Jyoti Jadeja             | NTAHC                                                                  | P  |
| Katherine McNamara       | NT Health                                                              | P  |
| Katie McGuire            | Menzies School of Health Research                                      | P  |
| Keith Forrest            | Mala'la Health Service Aboriginal Corporation                          | P  |
| Kelly Banz               | NT Health                                                              | P  |
| Kelly-Anne Stuart-Carter | NT Health                                                              | P  |
| Khim Tan                 | NT Health                                                              | P  |
| Leanne O'Connor          | NT Health                                                              | P  |
| Lesley Scott             | NT Health                                                              | P  |
| Letisha Murray           | NT Health                                                              | P  |
| Levinia Crooks^          | ASHM                                                                   | P  |
| Linda Bunn               | NT Health                                                              | P  |
| Lorraine Johns           | Katherine West Health Board Aboriginal Corporation                     | P  |
| Lucie Perrisel           | ASHM                                                                   | P  |
| Marco Briceno            | NT Health                                                              | P  |
| Margaret Littlejohn      | Doherty Institute for Infection and Immunity                           | P  |
| Maria Scarlett           | NTAHC                                                                  | P  |

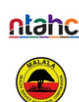

# Hep B PAST



Partnership Approach to Sustainably eliminating chronic hepatitis B in the Northern Territory

|                       |                                                                        |   |
|-----------------------|------------------------------------------------------------------------|---|
| Marilou Capati        | Top End Medical Centre                                                 | P |
| Matthew Maddison      | NT Health                                                              | P |
| Melita McKinnon       | Menzies School of Health Research                                      | P |
| Mikaela Mobsby        | NT Health                                                              | P |
| Molly Shorthouse      | Miwatj Health Aboriginal Corporation                                   | P |
| Natasha Tatipata      | NT Health                                                              | P |
| Nicole Romero         | WHO Collaborating Centre for Viral Hepatitis, VIDRL, Doherty Institute | P |
| Paula Binks           | Menzies School of Health Research                                      | P |
| Penny Ramsey          | NT Health                                                              | P |
| Peter Markey          | NT Health                                                              | P |
| Peter Nihill          | NT Health                                                              | P |
| Phoebe Schroder       | ASHM                                                                   | P |
| Prashanti Manchikanti | Miwatj Health Aboriginal Corporation                                   | P |
| Rebecca Katiforis     | NT Health                                                              | P |
| Robyn Liddle          | Menzies School of Health Research                                      | P |
| Rosalind Webby        | NT Health                                                              | P |
| Richard Sullivan      | Menzies School of Health Research                                      | P |
| Sami Stewart          | ASHM                                                                   | P |
| Sandra Nelson         | NT Health                                                              | P |
| Sean Heffernan        | Katherine West Health Board Aboriginal Corporation                     | P |
| Sean Taylor           | NT Health                                                              | P |
| Shiraline Wurrawilya  | NT Health                                                              | P |
| Sinon Cooney          | Katherine West Health Board Aboriginal Corporation                     | P |
| Sonja Hill            | ASHM                                                                   | P |
| Stephen Locarnini     | Doherty Institute for Infection and Immunity                           | P |
| Steven Skov           | NT Health                                                              | P |
| Su Govindasamy        | ASHM                                                                   | P |
| Sudharsan Venkatesan  | Menzies School of Health Research and NT Health                        | P |
| Tammy-Allyn Fernandes | NT Health                                                              | P |
| Tanya Plavins         | Central Australian Aboriginal Congress                                 | P |
| Teresa De Santis      | NT Health                                                              | P |
| Terese Ngurruwuthun   | Miwatj Health Aboriginal Corporation                                   | P |
| Tiana Alley           | Menzies School of Health Research                                      | P |
| Timothy Nabegeyo      | NT Health                                                              | P |
| Vanessa Towell        | ASHM                                                                   | P |
| Wendy Page            | Miwatj Health Aboriginal Corporation                                   | P |

**Key:** CI - Chief Investigator, AI- Associate Investigator, PI – Partner Investigator, P – Partner, ^ - Deceased

**Contact person:** Jane Davies - [Jane.davies@menzies.edu.au](mailto:Jane.davies@menzies.edu.au)
