# Supplementary material for: An evaluation and refinement of the “Hep B Story” app, tailored to meet the community’s cultural needs
Source: PubMed Central journal article supplement (PMC11162029; doi:10.1186/s12913-024-11149-y), 2024-06-07
Supplement: 12913_2024_11149_MOESM2_ESM.pdf [file 12913_2024_11149_MOESM2_ESM.pdf]

## Semi-structured interview and community focus group guide – “Hep B Story” app evaluation.

| <p><b>Reiterate confidentiality; it is not a test, just exploring ideas, with no consequences. Feel free to speak openly and honestly and ask as many questions as they would like to.</b></p>                                                                                                                                                                                                                                                                                                                                      |                                             |
|-------------------------------------------------------------------------------------------------------------------------------------------------------------------------------------------------------------------------------------------------------------------------------------------------------------------------------------------------------------------------------------------------------------------------------------------------------------------------------------------------------------------------------------|---------------------------------------------|
| <ul style="list-style-type: none"> <li>• Can you tell me a bit about yourself, where you live, what you do</li> <li>• Gender/age/remoteness</li> <li>• Role within family, community, work</li> <li>• Number of languages spoken</li> <li>• First language</li> </ul>                                                                                                                                                                                                                                                               | Background of each individual.              |
| <ul style="list-style-type: none"> <li>• What do you understand by the phrase Hepatitis B infection?<br/><b>(If no knowledge, move directly to the next section)</b></li> <li>• What do you think it is/does?</li> <li>• Where did this knowledge come from?</li> <li>• Your perception of the general Community’s knowledge?</li> <li>• Does it concern you?</li> <li>• What harm, if any, do you think it causes?</li> <li>• How do you think you get Hepatitis B?</li> <li>• Is it a problem for you or your family?</li> </ul>  | Hepatitis B knowledge.                      |
| <ul style="list-style-type: none"> <li>• What do you think of the Hep B Story app?</li> <li>• Is it helpful?</li> <li>• Do you think the app contains the right amount of information? <ul style="list-style-type: none"> <li>• Too much?</li> <li>• Too little?</li> <li>• Anything missing?</li> <li>• Anything that shouldn’t be there?</li> </ul> </li> <li>• Anything about the images that are not appropriate for your language?</li> <li>• Anything about the content that is not appropriate for your language?</li> </ul> | Thoughts about the app content.             |
| <ul style="list-style-type: none"> <li>• Do you think the app is culturally appropriate for most Aboriginal people in the NT?</li> <li>• Is there anything in the app that might offend Aboriginal people who speak your language?</li> <li>• Would you like to see the app in your language?</li> </ul>                                                                                                                                                                                                                            | Cultural Safety.                            |
| <ul style="list-style-type: none"> <li>• Do you think people want to understand more about hepatitis B?</li> <li>• Do you think it is helpful for people to understand more?</li> </ul>                                                                                                                                                                                                                                                                                                                                             | Attitudes towards Western health knowledge. |
| <ul style="list-style-type: none"> <li>• Do you think it would help people to have the app in your language?</li> <li>• Do you think it will improve people’s knowledge?</li> <li>• Do you think it will make people more likely to go to the clinic to get care for their hepatitis B?</li> <li>• Are you aware of any shame or stigma about hepatitis B – if so, do you think the app could help change this?</li> </ul>                                                                                                          | Translation into other languages.           |
